# Supplementary material for: Faster Cryptococcus Melanization Increases Virulence in Experimental and Human Cryptococcosis
Source: J Fungi (Basel). 2022 Apr 12;8(4):393. doi: 10.3390/jof8040393 (PMC9029458; doi:10.3390/jof8040393)
Supplement: Supplementary file 1 [file jof-08-00393-s001.zip › Supplementary table S1.xlsx]

## Sheet: Brasília
Variable classification				Details	CTL001	CTL002	CNB001	CNB002	CNB003.1	CNB004.1	CNB004.2	CNB006	CNB007.1	CNB007.2	CNB008.1	CNB008.2	CNB010	CNB012	CNB013.1	CNB013.2	CNB015	CNB016	CNB017.1	CNB018	CNB020	CNB021.1	CNB022	CNB023	CNB024	CNB025	CNB026	CNB027	CNB029.1	CNB029.2	CNB030.1	CNB030.2	CNB031.1	CNB032	CNB034	CNB035.1	CNB035.2	CNB036.1	CNB040	CNB042	CNB076.1	CNB076.2	CNB077	CNB080	CNB081
Patient	Demographical		Gender	Male (1); female(2); not informed(9).			1	1	2	1		1	1		1		2	2	1		1	1	2	2	1	1	1	1	2	1	2	2	2		1		1	1	1	1		2	1	2	1		2		1
			Age	Age in years.			53	66	57	22		40	35		64		39	44	42		48	32	56	32	57	21	43	43	24	6	32	51	55		69		45	85	50	21		52	44	20	56		16		36
	Risk factors	HIV/AIDS	HIV infection status	Tested and positive (1); tested and negative (2); not tested (3); not informed (9).			1	2	2	1		1	1		1		1	1	1		1	1	2	2	1	1	1	2	1	2	1	1	1		2		1	9	1	1		1	1	1	2		2		2
			In HIV-positive patients : absolute CD4+ count	CD4+ cell count in cells per mm3.			75					10			14		204	46	95		67	128			140	36	206		19								37		253
		Other	Diabetes	Yes (1); no (0); not informed (9).			0	0	1	0		0	0		0		0	0	0		9	0	9	1	0	0		9	0	0	0	1	0		0		0	9	0	0		0	0	0	0		0		0
			Use of immunomodulators	Yes-corticosteroid (1); yes-TNF-alpha inhibitor (2); yes-cancer chemotherapy (3); yes-other immunossupressors (4); no (0); not informed (9).			0	0	0	0		0	0		0		0	0	0		0	0	1;4	1	0	0		0	0	9	0	0	0		1		1	9	0	0		0	0	0	0		0		0
			Primary immunodeficiencies	Yes (1); no (0); not informed (9).			9	9	9	9		9	9		9		9	9	9		9	0	1	9	9	9		9	9	9	9	9	9		9		9	9	9	9		9	9	9	9		9		9
	Clinical	Disease site	Disease site	Central nervous system (1); lungs (2); skin (3); bloodstream (4).			1	1	1	1		1	1		1		1	1	1		1	1;4	1	1	1	1;4	2	1	1	2	4	1	1		1		1;4	1	1	1		1	1	1	1		1		1
		Diagnosis	CSF opening pressure	Cerebrospinal fluid opening pressure in cmH2O.				15	19	14		55			80		15	42	24				52	47								26	55		25					80					65		60		50
			Intracranial hypertension upon diagnosis	Present (1); absent (2); not informed(9). Defined as opening pressure >25 cmH2O or papilledema on ophthalmoscopy.			9	2	2	2		1	1		1		1	1	2		9	9	1	1	9	9		1	9	9	9	1	1		1		9	9	9	1		9	9	9	1		1		1
		Treatment	Induction treatment with Amphotericin B deoxycholate	Yes (1); no (0).			0	1	0	0		0	1		1		1	1	1		0	1	1	1	0	1		1	0	0	0	1	1		1		0		0	0		0	0	0	0		0		0
			Induction treatment with Amphotericin B deoxycholate plus fluconazole	Yes (1); no (0).			0	1	0	0		1	1		0		0	1	0		0	0	0	0	0	0		0	1	0	0	0	0		0		0		0	0		0	0	0	0		0		0
			Induction treatment with lipossomal Amphotericin B	Yes (1); no (0).			1	0	0	0		0	1		1		1	1	1		0	0	1	0	0	0		1	0	0	0	0	1		1		1		1	0		0	0	1	0		1		1
			Induction treatment with lipossomal Amphotericin B plus fluconazole	Yes (1); no (0).			0	0	1	1		1	0		0		0	0	0		1	0	0	0	0	0		0	1	0	0	0	0		0		0		0	1		1	1	0	1		1		0
			Induction treatment with Amphotericin B lipid complex	Yes (1); no (0).			0	0	0	0		0	0		0		0	0	1		0	0	0	0	0	0		0	0	0	0	0	0		0		0		0	0		0	0	0	0		1		0
			Induction treatment with Amphotericin B lipid complex plus fluconazole	Yes (1); no (0).			0	0	0	0		0	0		0		0	0	1		0	0	0	0	0	0		0	0	0	0	0	0		0		0		0	0		0	0	0	0		0		0
			Amphotericin B deoxycholate accumulated dose	Cumulative dose in grams until death or cure.			0	0.45	0	0		0.25	0.64		0.25		0.6	0.5	0.15		0	0.8	0.24	0.2	0	1.65		1.3	0.4	0	0	0.15	1.02		0.1				0	0		0	0	0	0		0		0
			Lipidic Amphotericin B accumulated dose	Cumulative dose in grams until death or cure.			0.2	0	3.8	0.24		9.5	2		9.3		7	1.2	5.8		5.8	0	9.2	0	0	0		1.6	0.15	0	0	0	4.05		8.5		2		5.65	0.1		2.2	2.8	0.6	16.15		6.4		12.25
			Treatment according to the Brazilian guidelines?	Adequate treatment according to the Brazilian cryptococcosis guidelines. This includes measuring opening pressure, adequately managing intracranial pressure by spinal taps and/or ventriculoperitoneal shunts, use of amphotericin B plus a second drug for therapy. Yes (1); no (0); not informed (9).			0	1	1	1		1	0		0		0	1	1		0	0	0	0	0	0	0	0	0	0	0	0	0		0		0	9	0	0		0	0	0	1		1		0
		Prognosis	Poor prognosis criteria	Signs and symptoms present on admission: confusion (1); lowered conciousness (2); coma(3); focal neurological deficits (4); none (0).			1;4	4	1;4	4		1;4	0		1		4	1	0		1;2	4	4	0	0	0		4	1	0	1	1;2	0		1				0	4		0	1	4	0		1;4		0
	Outcome		Survival time	Time in days between laboratory-confirmed diagnosis of cryptococcosis and death or loss to follow up.			3	34	303	2		63	24		78		34	14	32		26	20	85	5	5	70		126	25	0	4	3	37		45		78		98	3		11	14	2	105		33		49
			Outcome at survival time	Death (1); loss to follow up while alive (9); release after cure(0).			1	0	0	1		0	1		1		0	1	0		0	0	0	1	1	0	0	1	0	1	1	1	1		0		1	9	1	1		1	1	1	0		1		0
			Presence of neurological sequelae	Cognitive or behavioral changes (1); visual changes (2); motor deficit (3); none(0).			0	2	0	0		0	0		0		0	0	0		0	0	2	0	0	0	0	0	0	0	0	0	0		0				0	0		0	0	0	1		0		0
Isolate	Virulence	Capsule	Thickness in Sabouraud medium (normalized with H99)	Capsule thickness of cells grown in Sabouraud medium, normalized by the value obtained with H99 in each individual experiment. Mean of three independent experiments performed in different days, with 20 cells measured per experiment.	1	0.981644															1.14393		0.893465			1.05326	0.96413		1.02337	0.904921	0.83916					1.09055			0.805681				0.997376				1.15744
			Thickness in Sab-MOPS medium (normalized with H99)	Capsule thickness of cells grown in Sab-MOPS medium, normalized by the value obtained with H99 in each individual experiment. Mean of three independent experiments performed in different days, with 20 cells measured per experiment.	1	0.994366															1.2677		1.00025			1.30797	0.927812		1.14126	1.04234	0.745839					1.21078			0.690001				0.964015				1.22073
			Thickness in MM (normalized with H99)	Capsule thickness of cells grown in minimal medium, normalized by the value obtained with H99 in each individual experiment. Mean of three independent experiments performed in different days, with 20 cells measured per experiment.	1	0.994366															1.30808		0.66723			1.21828	0.804202		1.10221	0.912497	0.671444					1.0715			0.692536				0.966848				1.11361
			Thickness in CIM (normalized with H99)	Capsule thickness of cells grown in CO2-independent medium, normalized by the value obtained with H99 in each individual experiment. Mean of three independent experiments performed in different days, with 20 cells measured per experiment.	1	0.924439															1.30061		0.668864			1.47486	0.734578		1.0014	0.857063	0.850419								0.729395				1.06364				1.84218
			Relative induction in Sab-MOPS	Capsule thickness of cells grown in Sab-MOPS medium for 24 h divided by the non-induced control (Sabouraud). Mean of three independent experiments performed in different days, with 20 cells measured per experiment.	1.738	1.901															1.926		1.946			2.158	1.673		1.938	2.002	1.545					1.93			1.489				1.68				1.833
			Relative induction in MM	Capsule thickness of cells grown in minimal medium for 24 h divided by the non-induced control (Sabouraud). Mean of three independent experiments performed in different days, with 20 cells measured per experiment.	1.58	1.945															1.807		1.18			1.828	1.318		1.702	1.593	1.264					1.553			1.358				1.532				1.52
			Relative induction in CIM	Capsule thickness of cells grown in CO2-independent medium for 24 h divided by the non-induced control (Sabouraud). Mean of three independent experiments performed in different days, with 20 cells measured per experiment.	1.233	1.257															1.402		0.923			1.727	0.94		1.207	1.168	1.25								1.117				1.315				1.963
			Supernatant GXM concentration (normalized with H99)	Concentration of GXM on culture supernatants from minimal medium measured by capture ELISA. The result of each clinical isolate was normalized by cell count at the end of culture. Normalized by the value obtained with H99 in each indivual experiment. Mean of three independent experiments performed in different days.	1																2.35733		0.916375			0.510368	1.40567		1.03261	1.17534	1.13347					0.420507			4.58105				4.51554				0.899569
		Melanization	Semi-quantitative melanization time in plates	Semi-quantitative melanization score. Seven groups ranging from 1 (slowest melanization, lightest colony) to 7 (fastest melanization, darkest colony). Result defined by two independent individuals blinded to each other's evaluation.	7	6
			Colony melanization pattern	Colony melanization phenotype: heterogeneous (melanization mostly at the center and edges of the colony) (0); homogeneous colony melanization (1).	1	1	0	0	0	0	0	0	1		0				0	0	0	0	1	0	0	1	0	0	0	1	1	0	0	1	0	0	1	0	0	0	0	1	0	0	0	0	1	1	0
			Melanization curve: Average tHMM/H99	Time in hours for the colony to reach half maximum melanization. Normalized by the value obtained with H99 in each experiment. Average of the value obtained from two replicate wells in the same experiment.	1	1.4477	1.57287	1.31636	2.6286	0.648663	4,01920439	2.19993	0.862483		1.58779				2.7497	2.83995	2.14467	2.48696	2.08985	2.9013	0.871008	1.82588	4.40834	1.928	1.81709	1.1073	1.29643	2.30785	1.59406	1.52848	2.48712	2.04987	1.51404	3.64822	1.93181	2.27637	2.04573	1,323305172	1.97321	2.11828	1.87071	1.06499	2.66365	1.17233	1.19307
			Melanization curve: Average Bottom/H99	Median gray level of the colony image at the beggining of the experiment. Normalized by the value obtained with H99 in each individual experiment. Average of the value obtained from two replicate wells in the same experiment.	1	1.36432	1.05315	1.0031	0,943623494	0,404942258	1.19583	1.26537	1.21296		1.07923				1.49971	1.42999	0.764806	1.43629	1.45489	1.21446	1.24374	1.32513	0.98638	1.27211	1.19669	1.09607	1.33026	1.42288	1.4423	1.40876	1.27729	1.32183	1.21339	1.21763	1.18439	1.25996	1.42663	1.16745	1.18532	1.24292	1.1289	0.996771	0.850766	1.18366	1.12256
			Melanization curve: Average Top/H99	Median gray level of the colony image at the end of the experiment. Proportional to how dark the colony turned. Normalized by the value obtained with H99. Average of the value obtained from two replicate wells in the same experiment.	1	0.987701	0.599376	0.717914	0.913547	0.852941	1.57665	0.768271	1.01515		0.614082				0.654294	0.644799	0.703736	0.831679	0.946914	0.934764	0.670753	0.925569	1.13768	0.970652	0.935261	0.995684	0.998274	0.589317	0.958136	0.950367	0.704904	0.695271	1.03625	0.805352	0.521795	0.636167	0.543375	0.999124	0.595884	0.583625	0.713012	0.455882	1.36797	0.986631	0.819519
			Melanization curve: Average Span/H99	Difference in median gray levels of the colony at the beggining and end of the experiment (difference between top and bottom). Normalized by the value obtained with H99. Average of the value obtained from two replicate wells in the same experiment.	1	0.898794	0.345379	0.557818	0.896456	1.10354	1.78944	0.489507	0.9041		0.353648				0.301163	0.316585	0.676583	0.579131	0.735006	0.803468	0.402826	0.7386	1.20073	0.845165	0.826193	0.9541	0.859241	0.199486	0.755814	0.758874	0.437315	0.402505	0.962056	0.633415	0.245104	0.375398	0.174541	0.92036	0.320617	0.275145	0.480473	0.15337	1.69349	0.875608	0.649896
			Melanization curve: Average HillSlope/H99	Slope of the sigmoidal curve at the inflection point, proportional to how fast the colony melanizes. Normalized by the value obtained with H99. Average of the value obtained from two replicate wells in the same experiment.	1	1.39087	0.65675	0.694642	0.380847	0.281824	0.469805	0.942126	0.711516		0.754589				3.49853	5.82301	0.871642	1.61858	1.67935	0.561783	2.35428	1.26721	0.456932	1.82743	1.3885	1.47345	1.42684	1.91032	1.7233	1.5528	0.593066	1.76538	0.970501	0.678466	1.00796	1.29115	1.21298	0.97732	1.52972	1.75782	0.6082	2.21137	0.251133	1.078	0.91489
			Whole-cell laccase specific activity (normalized against H99, 24well, µmol/h/cell)	Whole-cell laccase activity, normalized by the value obtained with H99 on the same experiment. Fungi grown in 24-well plate.	1	1.01748	0.393375	0.485833	0.623477	1.11361	0.600581	0.972933	0.991518	0.691615	0.890395	0.565046	1.11387	0.641652	0.362782	0.567781	0.423187	0.43376	0.547861	0.369923	0.461731	0.582385	0.671839	1.20766	0.42229	0.607542	0.548459	0.673616	0.548551	0.507353	0.664193	0.422866	0.62046	0.467242	0.617913	0.517788	0.738252	0.57826	0.784949	0.951535	0.408677	0.581066	0.573901	1.32132	0.690572
			Whole-cell laccase specific activity (normalized against H99, 96well, µmol/h/cell)	Whole-cell laccase activity, normalized by the value obtained with H99 on the same experiment. Fungi grown in 96-well plate.	1		0.571413	0.936759	0.90093	1.01398	1.23358	1.12725	0.76709	1.10933	0.949777	0.693876	1.18352	0.879553	0.985185	0.777292	1.28156	1.40682	1.49175	0.611956	0.587784	0.36585	1.78032	2.1294	1.14515	2.26902	1.76108	0.732621	1.68013	1.6924	0.790105	0.618225	1.16772	1.21921	1.85369	1.93056	1.50918	0.869844	0.884405	0.835753	0.797994	0.54265	0.835125	0.757104	0.423219
			Supernatant laccase specific activity (normalized against H99, µmol/h/cell)	Specific laccase activity in the fungal culture supernatant, normalized by the H99 value.	1	0.0725493	0.773913	0.742959	0.06042	0.0189326	0.0259275	0.0382464	0.0843427	0.00900438	0.0743592	0.0347614	0.0823428	0.0728121	0.832998	0.209243	0.774892	0.650282	0.341613	0.609493	0.111495	0.0606602	1.2974	0.494972	0.173881	0.818493	0.446185	0.359346	0.258502	0.0478233	0.379703	0.0650369	0.384039	0.411363	0.326737	0.679852	0.350791	0.284225	1.45209	0.0199108	0.377207	0.127668	0.790615	0.0815812	0.382827
		Vesicles	Secreted ergosterol per cell during 72h	Indirect measurement of the amount of extracellular vesicles. Ergosterol concentration in µg/mL measured with a commercial kit normalized by cell counts/mL. All samples were analyzed in duplicate and under the same conditions.	2.7246e-10	1.6604e-10
			Average vesicle size (DLS)	Hydrodynamic radius of the vesicles measured by dynamic light scattering. All samples were analyzed three times with ten reads each time.	1	0.60705
			Average vesicle polydispersity (DLS)	Polidispersity index of the vesicles measured by dynamic light scattering. The values range from 0 (100% homogeneous) to 1 (100% heterogeneous). All samples were analyzed three times with ten reads each time.	1	0.74574
	Host response	Galleria mellonella	Galleria mellonella median survival time (days). Ratio of G. mellonella median survival with each isolate by H99 per experiment	Median Survival (days) of G. mellonella infected with each isolate, normalized by H99 in each experiment. Each group consisted of 12 larvae that were infected with 10E4 cells from each isolate	1	0.8															1.42857		1.28571			0.285714	1.85714		1.42857	0.285714	1								1.14286				1.42857				0.285714		1.28571
		Macrophage	Immunofluorescence microscopy - Percentage of J774 cells with at least one internalized yeast cell within an LC3-Positive phagosome	Percentage of J774 cells with at least one of the internalized yeast cells within an LC3-positive phagosome.	0.5306														0.867347		0.68	0.768421			0.346939	0.56	0.838384	0.81	0.622449	0.533333	0.483871	0.652632	0.621053		0.65			0.891566	0.786517	0.741935		0.52	0.61	0.88172
			Immunofluorescence microscopy - Percentage of J774 cells with all internalized yeast cells within LC3-positive phagosomes	Percentage of J774 cells with all internalized yeast cells within LC3-positive phagosomes.	0.4082														0.540816		0.6	0.431579			0.0816327	0.37	0.575758	0.5	0.397959	0.2	0.311828	0.578947	0.378947		0.51			0.506024	0.426966	0.44086		0.38	0.51	0.817204
			Immunofluorescence microscopy - Percentage of J774 cells with at least one internalized yeast cell.	Percentage of J774 cells with at least one internalized yeast cell.	0.169844														0.16092		0.210084	0.160202			0.375479	0.293255	0.217105	0.219298	0.241975	0.172084	0.191753	0.154221	0.22673		0.177305			0.123328	0.185804	0.213793		0.193798	0.271739	0.208989
			Immunofluorescence microscopy - Phagocytic index.	The phagocytic index was the ratio of the number of intracellular yeast cells to the number of J774 cells counted.	1.35714														2.09184	2.73	1.75	3.45263			2.94898	2.21	2.49495	2.23	2.17347	2.93333	2.50538	1.57895	2.55789		1.6	1.68		2.55422	3.04494	3.17204		2.27	2.14	1.97849
	Molecular typing		Species complex	Species complex definition by molecular sequencing of the URA5 locus, supplemented by CGB agar and/or MALDI-TOF mass spectrometry. C. neoformans (1); C. gattii (2)			1	1	1	1	1	1	1	1	1	1	1	1	1	1	1	1	1		1	1	1	1	1	1	1	1	1	1	1	1	1	1	1	1	1	1	1	1	1	1	1	1	1
[truncated: 11 more columns]

## Sheet: Rio de Janeiro
Variable classification				Details	CTL001	CTL002	CNF001.1	CNF002	CNF003	CNF004	CNF005	CNF001.2	CNF007	CNF008	CNF001.3	CNF010	CNF011	CNF012	CNF013	CNF014.1	CNF014.2	CNF016	CGF001	CGF002	CGF003	CGF004	CGF005	CGF006	CGF007	CGF008	CGF009	CGF010	CGF011	CGF012
Patient	Demographical		Gender	Male (1); female(2); not informed(9).
			Age	Age in years.
	Risk factors	HIV/AIDS	HIV infection status	Tested and positive (1); tested and negative (2); not tested (3); not informed (9).
			In HIV-positive patients : absolute CD4+ count	CD4+ cell count in cells per mm3.
		Other	Diabetes	Yes (1); no (0); not informed (9).
			Use of immunomodulators	Yes-corticosteroid (1); yes-TNF-alpha inhibitor (2); yes-cancer chemotherapy (3); yes-other immunossupressors (4); no (0); not informed (9).
			Primary immunodeficiencies	Yes (1); no (0); not informed (9).
	Clinical	Disease site	Disease site	Central nervous system (1); lungs (2); skin (3); bloodstream (4).
		Diagnosis	CSF opening pressure	Cerebrospinal fluid opening pressure in cmH2O.
			Intracranial hypertension upon diagnosis	Present (1); absent (2); not informed(9). Defined as opening pressure >25 cmH2O or papilledema on ophthalmoscopy.
		Treatment	Induction treatment with Amphotericin B deoxycholate	Yes (1); no (0).
			Induction treatment with Amphotericin B deoxycholate plus fluconazole	Yes (1); no (0).
			Induction treatment with lipossomal Amphotericin B	Yes (1); no (0).
			Induction treatment with lipossomal Amphotericin B plus fluconazole	Yes (1); no (0).
			Induction treatment with Amphotericin B lipid complex	Yes (1); no (0).
			Induction treatment with Amphotericin B lipid complex plus fluconazole	Yes (1); no (0).
			Amphotericin B deoxycholate accumulated dose	Cumulative dose in grams until death or cure.
			Lipidic Amphotericin B accumulated dose	Cumulative dose in grams until death or cure.
			Treatment according to the Brazilian guidelines?	Adequate treatment according to the Brazilian cryptococcosis guidelines. This includes measuring opening pressure, adequately managing intracranial pressure by spinal taps and/or ventriculoperitoneal shunts, use of amphotericin B plus a second drug for therapy. Yes (1); no (0); not informed (9).
		Prognosis	Poor prognosis criteria	Signs and symptoms present on admission: confusion (1); lowered conciousness (2); coma(3); focal neurological deficits (4); none (0).
	Outcome		Survival time	Time in days between laboratory-confirmed diagnosis of cryptococcosis and death or loss to follow up.
			Outcome at survival time	Death (1); loss to follow up while alive (9); release after cure(0).
			Presence of neurological sequelae	Cognitive or behavioral changes (1); visual changes (2); motor deficit (3); none (0).
Isolate	Virulence	Capsule	Thickness in Sabouraud medium (normalized with H99)	Capsule thickness of cells grown in Sabouraud medium, normalized by the value obtained with H99 in each individual experiment. Mean of three independent experiments performed in different days, with 20 cells measured per experiment.	1	0.981644	0.711748	0.674151	1.17661	1.71862	0.9962	0.770979	0.812946	0.948566	0.973256	1.14048	0.960884	1.13606	0.766328	1.66315	1.38933	0.813819	1.20586	1.24931	1.73512	1.07641	3.15473	1.10618	2.86918	1.82537	1.19103	2.98858	1.47286	1.13776
			Thickness in Sab-MOPS medium (normalized with H99)	Capsule thickness of cells grown in Sab-MOPS medium, normalized by the value obtained with H99 in each individual experiment. Mean of three independent experiments performed in different days, with 20 cells measured per experiment.	1	0.994366	0.898424	0.812681	1.68768	1.748	1.4081	0.765167	0.735197	1.50597	0.966433	1.57845	1.4903	1.21746	0.630479	2.07613	1.93909	1.66076	1.34181	1.59942	1.7119	1.29159	2.48912	1.01615	2.19386	2.38341	1.33839	3.69933	1.57581	1.23661
			Thickness in MM (normalized with H99)	Capsule thickness of cells grown in minimal medium, normalized by the value obtained with H99 in each individual experiment. Mean of three independent experiments performed in different days, with 20 cells measured per experiment.	1	0.994366	0.778174	0.651772	1.61697	1.72248	1.35593	1.17159	1.25087	1.39714	1.05844	1.60207	0.972973	1.40038	0.741546	1.84031	1.33998	1.33669	1.07251	1.03474	1.50094	0.875972	1.60924	0.842361	2.62987	1.61631	1.03311	2.32747	0.999706	1.03274
			Thickness in CIM (normalized with H99)	Capsule thickness of cells grown in CO2-independent medium, normalized by the value obtained with H99 in each individual experiment. Mean of three independent experiments performed in different days, with 20 cells measured per experiment.	1	0.924439	1.23491	0.739415	2.16556	0.998772	1.09564	0.860536	0.647518	1.23651	0.652969	1.78776	1.10272	1.36016	0.725798	2.24381	1.90033	0.948824	2.31699	2.80206	2.83733	2.55166	2.53837	1.22456	2.87647	2.94664	1.39564	2.80339	2.19283	1.87566
			Relative induction in Sab-MOPS	Capsule thickness of cells grown in Sab-MOPS medium for 24 h divided by the non-induced control (Sabouraud). Mean of three independent experiments performed in different days, with 20 cells measured per experiment.	1.738	1.901	1.873	1.788	2.128	1.509	2.097	1.472	1.342	2.355	1.473	2.053	2.301	1.59	1.22	1.852	2.07	3.027	1.367	1.573	1.212	1.474	0.969	1.129	0.94	1.604	1.381	1.521	1.315	1.336
			Relative induction in MM	Capsule thickness of cells grown in minimal medium for 24 h divided by the non-induced control (Sabouraud). Mean of three independent experiments performed in different days, with 20 cells measured per experiment.	1.58	1.945	1.515	1.339	1.904	1.388	1.886	2.105	2.132	2.04	1.507	1.946	1.403	1.708	1.341	1.533	1.336	2.275	1.218	1.134	1.184	1.114	0.698	1.042	1.255	1.212	1.187	1.066	0.929	1.243
			Relative induction in CIM	Capsule thickness of cells grown in CO2-independent medium for 24 h divided by the non-induced control (Sabouraud). Mean of three independent experiments performed in different days, with 20 cells measured per experiment.	1.233	1.257	1.939	1.226	2.057	0.649	1.229	1.247	0.89	1.457	0.75	1.752	1.282	1.338	1.058	1.508	1.528	1.303	1.631	1.904	1.388	2.012	0.683	0.94	0.851	1.37	0.994	0.796	1.264	1.399
			Supernatant GXM concentration (normalized with H99)	Concentration of GXM on culture supernatants from minimal medium measured by capture ELISA. The result of each clinical isolate was normalized by cell count at the end of culture. Normalized by the value obtained with H99 in each indivual experiment. Mean of three independent experiments performed in different days.	1		1.84208	1.52786	2.68828	5.41306	1.6141	0.716478	0.845905	1.77554	0.565482	1.55443	2.93674	1.29928	1.73686	1.09032	1.00097	1.00318	4.21779	2.53527	4.70293	3.58047	1.52099	1.22921	1.18308	2.70515	2.03782	0.921333	1.39516	2.89553
		Melanization	Semi-quantitative melanization time in plates	Semi-quantitative melanization score. Seven groups ranging from 1 (slowest melanization, lightest colony) to 7 (fastest melanization, darkest colony). Result defined by two independent individuals blinded to each other's evaluation.	7	6	2	4	5	2	4	5	3	5	2	3	3	1	2	6	7	1
			Colony melanization pattern	Colony melanization phenotype: heterogeneous (melanization mostly at the center and edges of the colony) (0); homogeneous colony melanization (1).	1	1	0	1	1	1	1	1	1	1		0	1	1	1	1	1	0	0	0	0	0	1	0	0	0	0	0	0	0
			Melanization curve: Average tHMM/H99	Time in hours for the colony to reach half maximum melanization. Normalized by the value obtained with H99 in each experiment. Average of the value obtained from two replicate wells in the same experiment.	1	1.4477	1.88086	1.49791	1.55098	1.32438	1.43933	1.86148	1.90156	1.71746		1.9401	1.85444	1.86082	1.09095	2.38053	1.51949	2.10769	2.22061	1.60958	1.96203	2.4557	2.7396	1.47125	1.26637	2.16998	1.74394	2.04882	2.01085	2.22242
			Melanization curve: Average Bottom/H99	Median gray level of the colony image at the beggining of the experiment. Normalized by the value obtained with H99 in each individual experiment. Average of the value obtained from two replicate wells in the same experiment.	1	1.36432	1.46195	1.54404	1.78345	1.83847	1.61172	1.46661	1.35345	1.77724		2.08431	1.8418	1.76037	1.1542	1.77635	1.94342	1.73841	0.652676	0.249056	0.79447	1.11481	0.886964	0.832112	0.841883	0.851321	0.822008	0.90262	1.005	0.896624
			Melanization curve: Average Top/H99	Median gray level of the colony image at the end of the experiment. Proportional to how dark the colony turned. Normalized by the value obtained with H99. Average of the value obtained from two replicate wells in the same experiment.	1	0.987701	0.474131	0.935963	0.905428	0.869381	0.933418	1	1.04114	0.909245		0.752332	0.945293	0.908397	0.998304	0.9419	0.964801	0.571247	0.957063	1.01288	0.595964	0.954058	0.526406	0.548733	0.429798	0.459854	0.470159	0.467153	0.459854	0.480034
			Melanization curve: Average Span/H99	Difference in median gray levels of the colony at the beggining and end of the experiment (difference between top and bottom). Normalized by the value obtained with H99. Average of the value obtained from two replicate wells in the same experiment.	1	0.898794	0.240797	0.792344	0.697955	0.640273	0.773466	0.889879	0.967488	0.704248		0.437441	0.733613	0.706869	0.96172	0.744625	0.733613	0.295281	1.14836	1.49405	0.470819	0.852344	0.29881	0.369699	0.170119	0.212946	0.248006	0.192232	0.116235	0.217145
			Melanization curve: Average HillSlope/H99	Slope of the sigmoidal curve at the inflection point, proportional to how fast the colony melanizes. Normalized by the value obtained with H99. Average of the value obtained from two replicate wells in the same experiment.	1	1.39087	1.2953	1.32897	1.18708	1.0357	1.19137	0.90714	0.716222	1.16335		1.35766	2.10122	1.71758	0.748305	2.17826	2.73385	1.06258	0.174081	0.143008	1.16384	0.977338	0.850764	0.874433	1.69548	1.31828	0.547927	2.93268	5.99966	1.8046
			Whole-cell laccase specific activity (normalized against H99, 24 well plate, µmol/h/cell)	Whole-cell laccase activity, normalized by the value obtained with H99 on the same experiment. Fungi grown in 24-well plate.	1	1.01748	0.198002	0.313038	0.476528	0.682894	0.460928	0.916053	0.736669	0.352167	0.895286	0.571586	0.415829	0.792395	0.416017	0.237539	2.92186	1.4504	0.245007	0.468708	0.724368	0.672437	1.18375	1.5526	1.02264	1.1771	0.818908	0.707057	0.57257	0.117177
			Supernatant laccase specific activity (normalized against H99, µmol/h/cell)	Specific laccase activity in the fungal culture supernatant, normalized by the H99 value.	1	0.0725493	0.0167641	0.0264037	0.0908815	0.0599999	0.223479	0.0490425	0.0788643	0.079245	0.027005	0.188307	0.141584	0.0246899	0.0425206	0.806552	0.162464	0.024137	0.519871	0.628451	0.935166	0.681055	0.393969	0.231947	0.316218	0.199192	0.565541	0.356115	0.738215	0.644065
		Vesicles	Secreted ergosterol per cell during 72 h	Indirect measurement of the amount of extracellular vesicles. Ergosterol concentration in µg/mL measured with a commercial kit normalized by cell counts/mL. All samples were analyzed in duplicate and under the same conditions.	54.492	33.208	7.6696	4.045	24.058	16.279	22.608	16.4398	15.464	11.6788	10.3078	19.7102	16.092	13.5416	11.4286	10.2818	27.452	14.9474
			Average vesicle size (DLS)	Hydrodynamic radius of the vesicles measured by dynamic light scattering. All samples were analyzed three times with ten reads each time.	294.1	178.533	195.3	149.967	129.567	181.233	201.067	164.3		344.2	204.5	192.333	143.667	249.3	186.467	173.767	142.667	179.533
			Average vesicle polydispersity (DLS)	Polidispersity index of the vesicles measured by dynamic light scattering. The values range from 0 (100% homogeneous) to 1 (100% heterogeneous). All samples were analyzed three times with ten reads each time.	0.489	0.364667	0.336	0.181333	0.152667	0.170667	0.325667	0.833		0.383	0.353333	0.215	0.463	0.463	0.482667	0.459333	0.283667	0.318
	Host response	Galleria mellonella	Galleria mellonella median survival time (days). Ratio of G. mellonella median survival with each isolate by H99 per experiment	Median Survival (days) of G. mellonella infected with each isolate, normalized by H99 in each experiment. Each group consisted of 12 larvae that were infected with 10E4 cells from each isolate	1	0.8	1.375	1.25	1.3125	1.625	1.125	1	1.25	1.0625	0.6875	1.1875	0.875	1.1875	1.37	0.375	1	1.0625	0.466667	1	1.21429	1.21429		1	1.21429	1.07143	1.21429	1.21429	1.21429	1.13333
	Molecular typing		Species complex	Species complex definition by Multi-Locus Sequence Typing (MLST). C. neoformans (1); C. gattii (2)	1	1	1	1	1	1	1	1	1	1	1	1	1	1	1	1	1	1	2	2	2	2	2	2	2	2	2	2	2	2
